# Supplementary material for: Single-cell transcriptomics reveals expansion of cytotoxic CD4 T cells in supercentenarians
Source: PubMed Central journal article supplement (PMC6883788; doi:10.1073/pnas.1907883116), 2019-11-12
Supplement: pnas.1907883116.sapp.pdf [file pnas.1907883116.sapp.pdf]

Figure S1

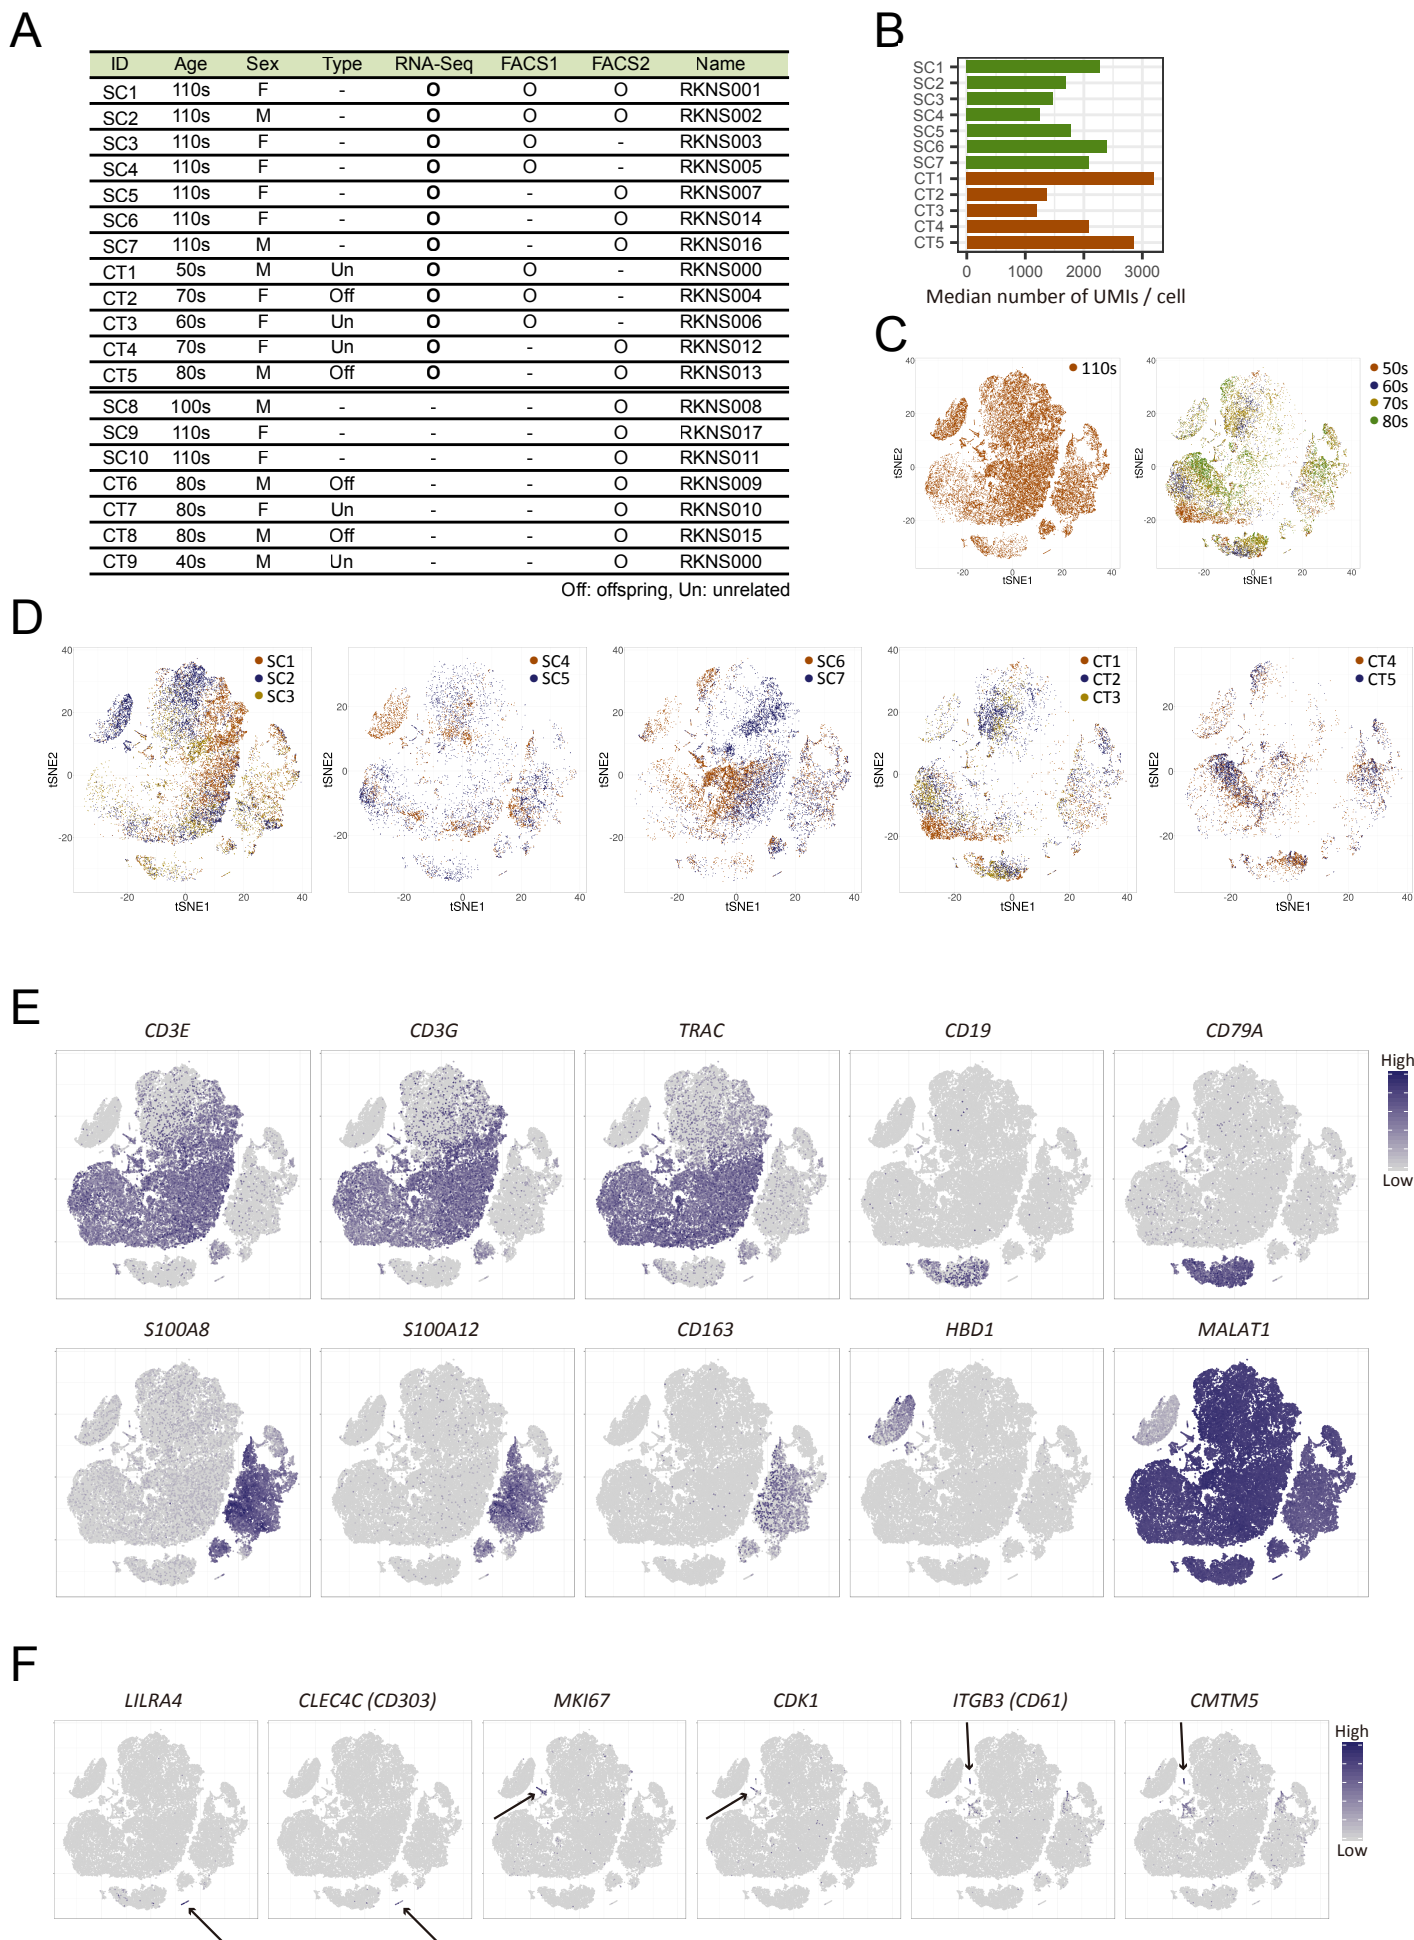

Figure S2

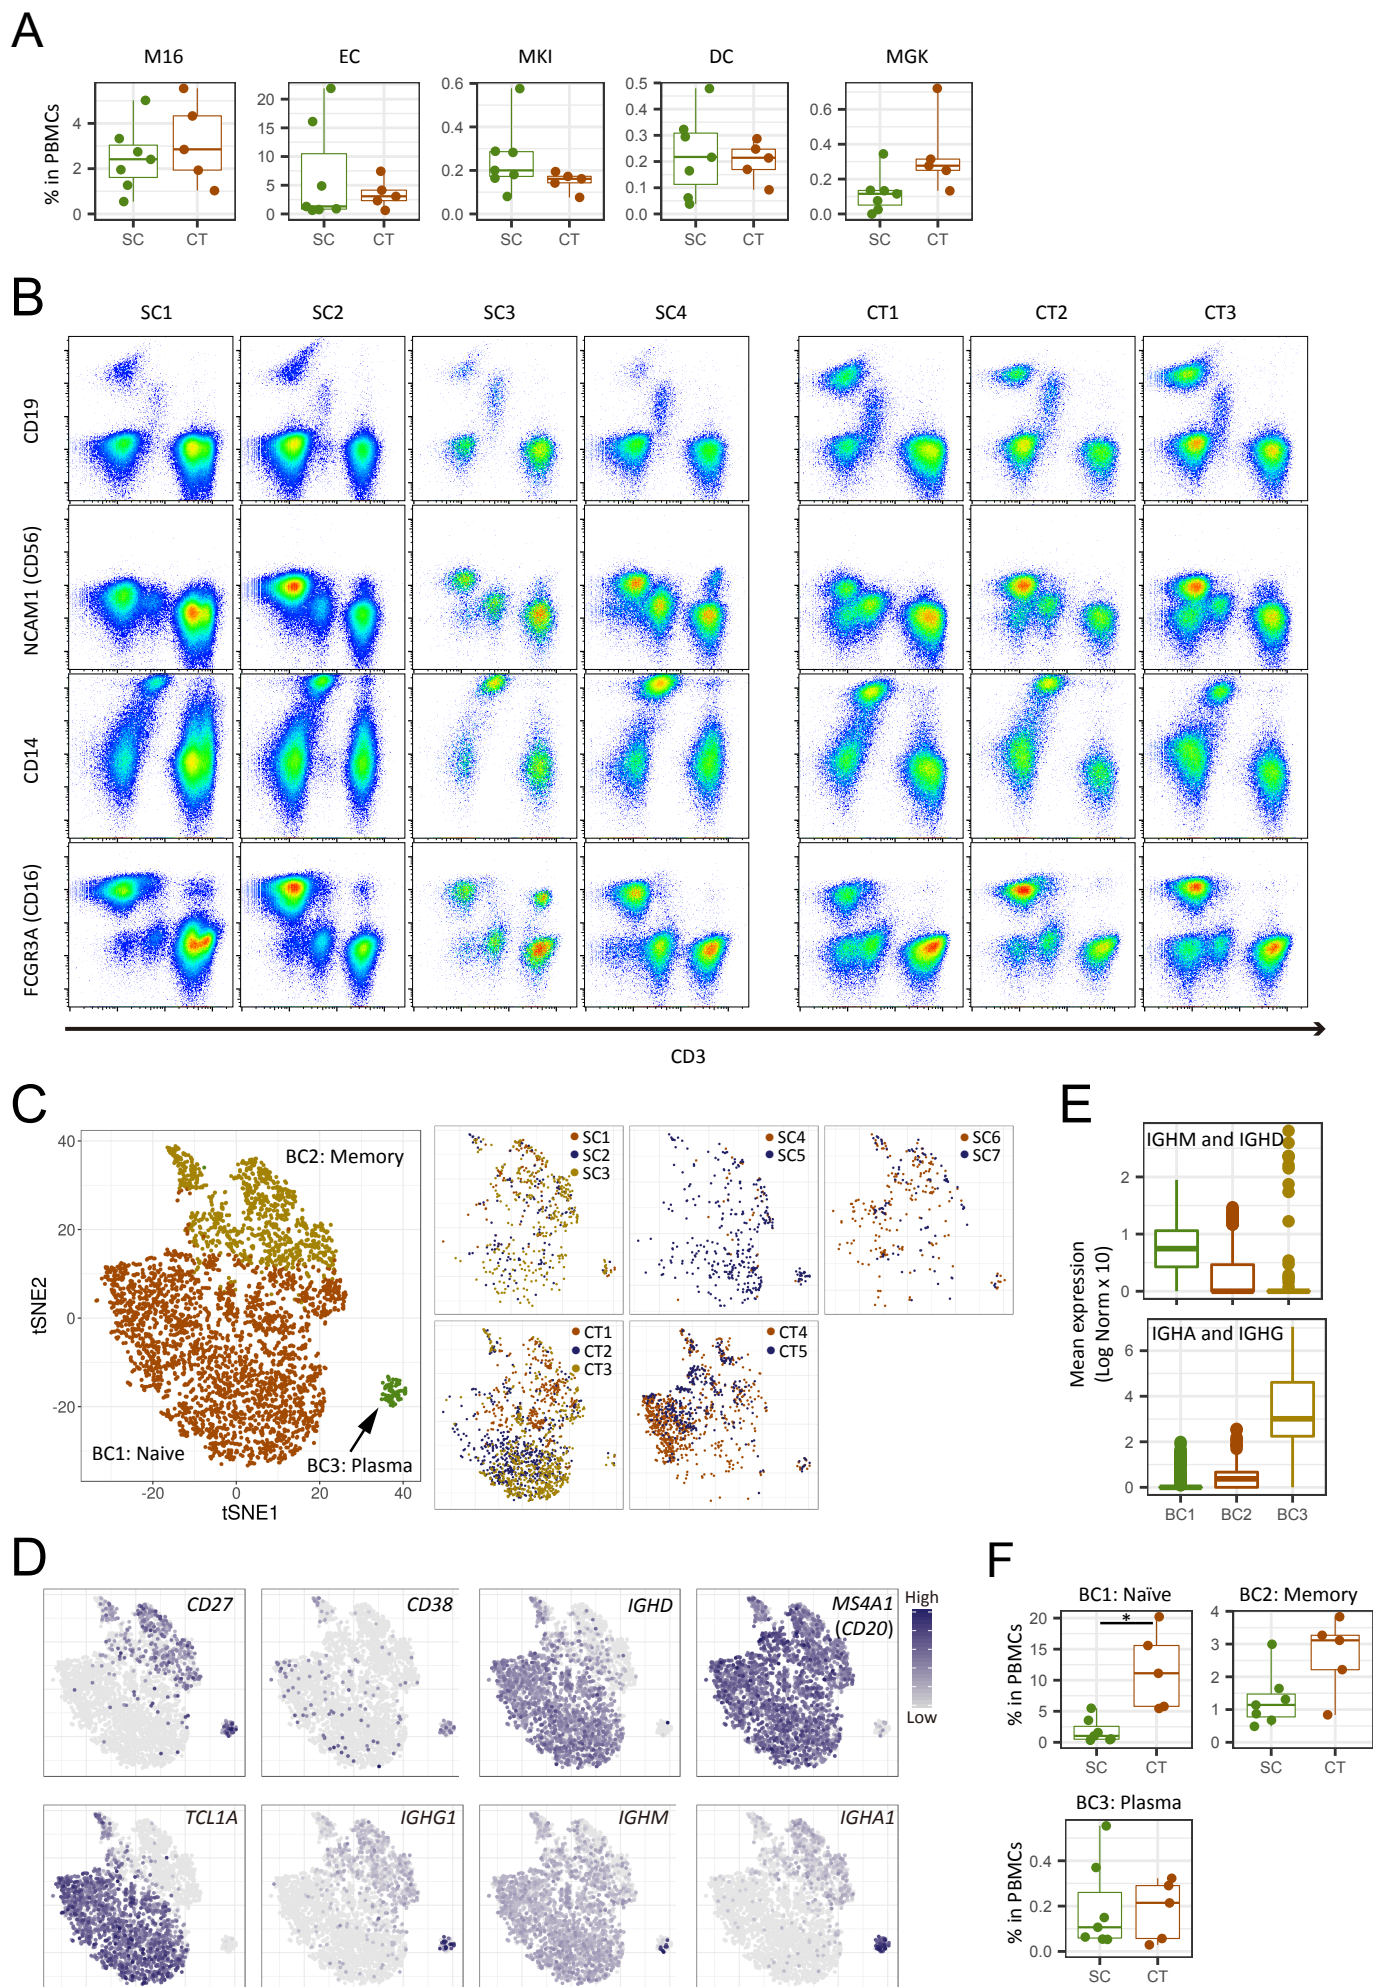



Figure S3

A

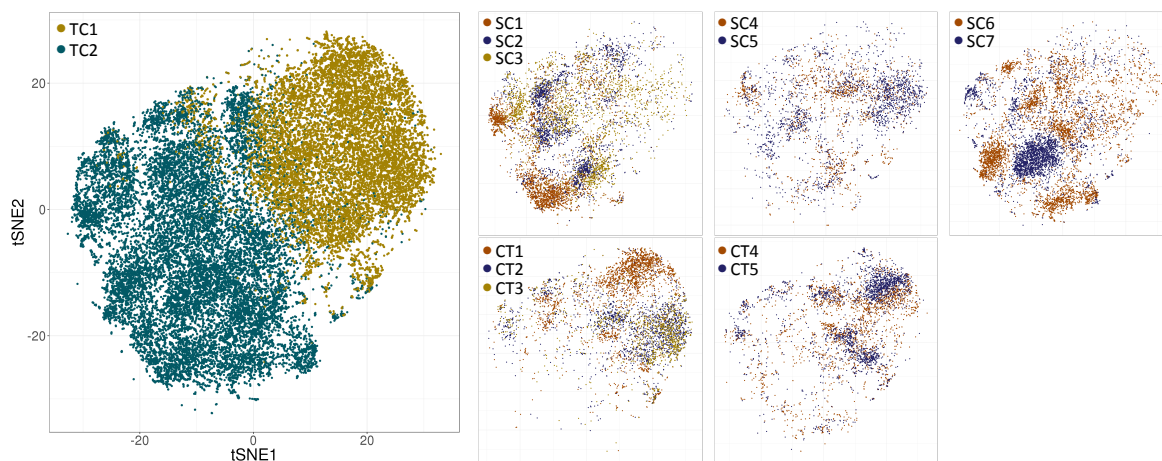

B

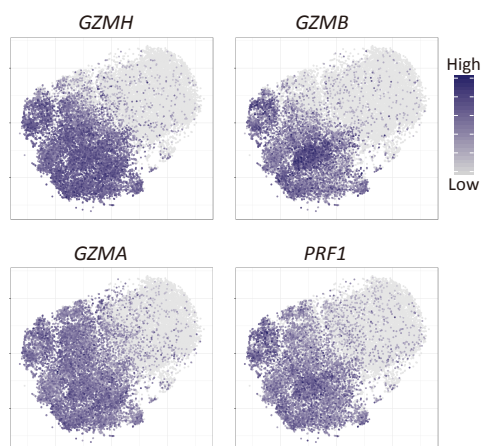

C

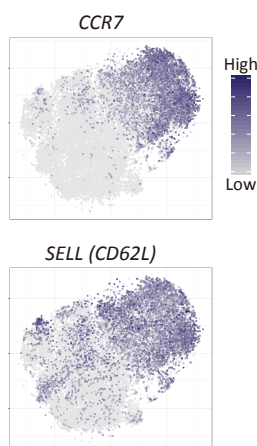

D

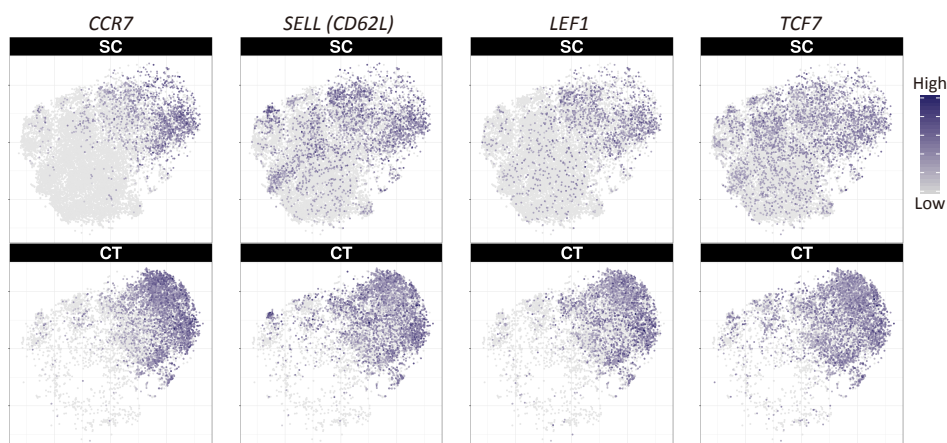

Figure S4

A

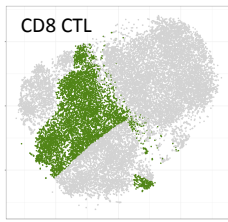

B

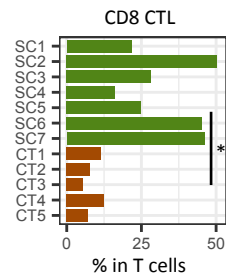

C

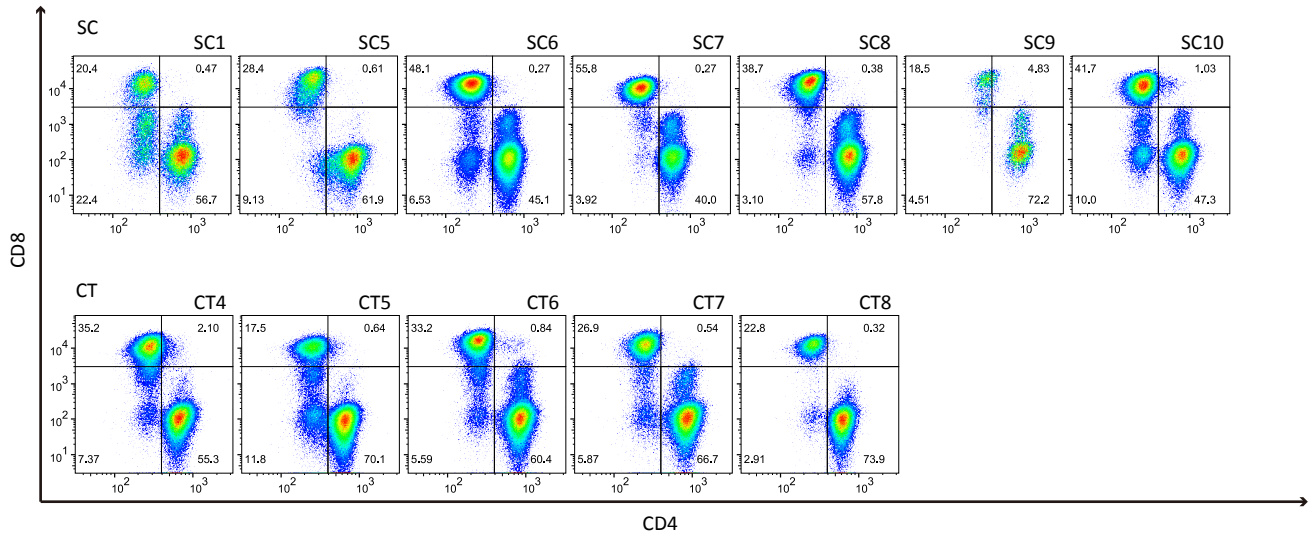

D

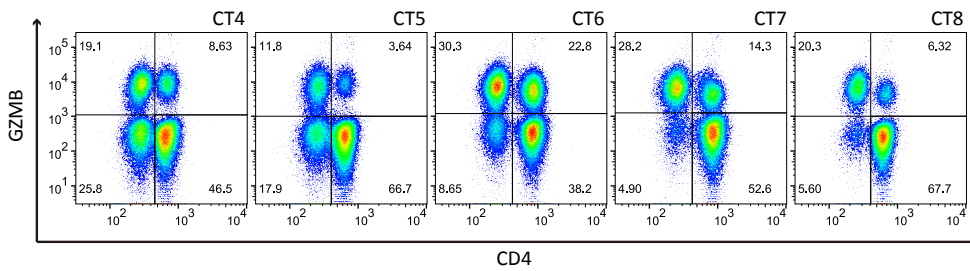

E

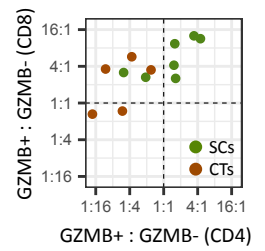

F

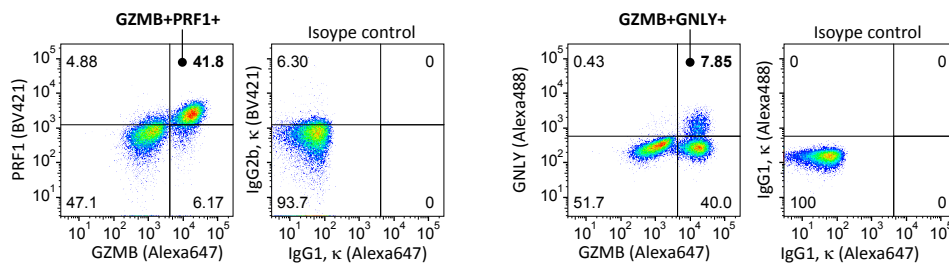

(Gated on live CD3<sup>+</sup> CD4<sup>+</sup> CD8<sup>-</sup>)



Figure S5

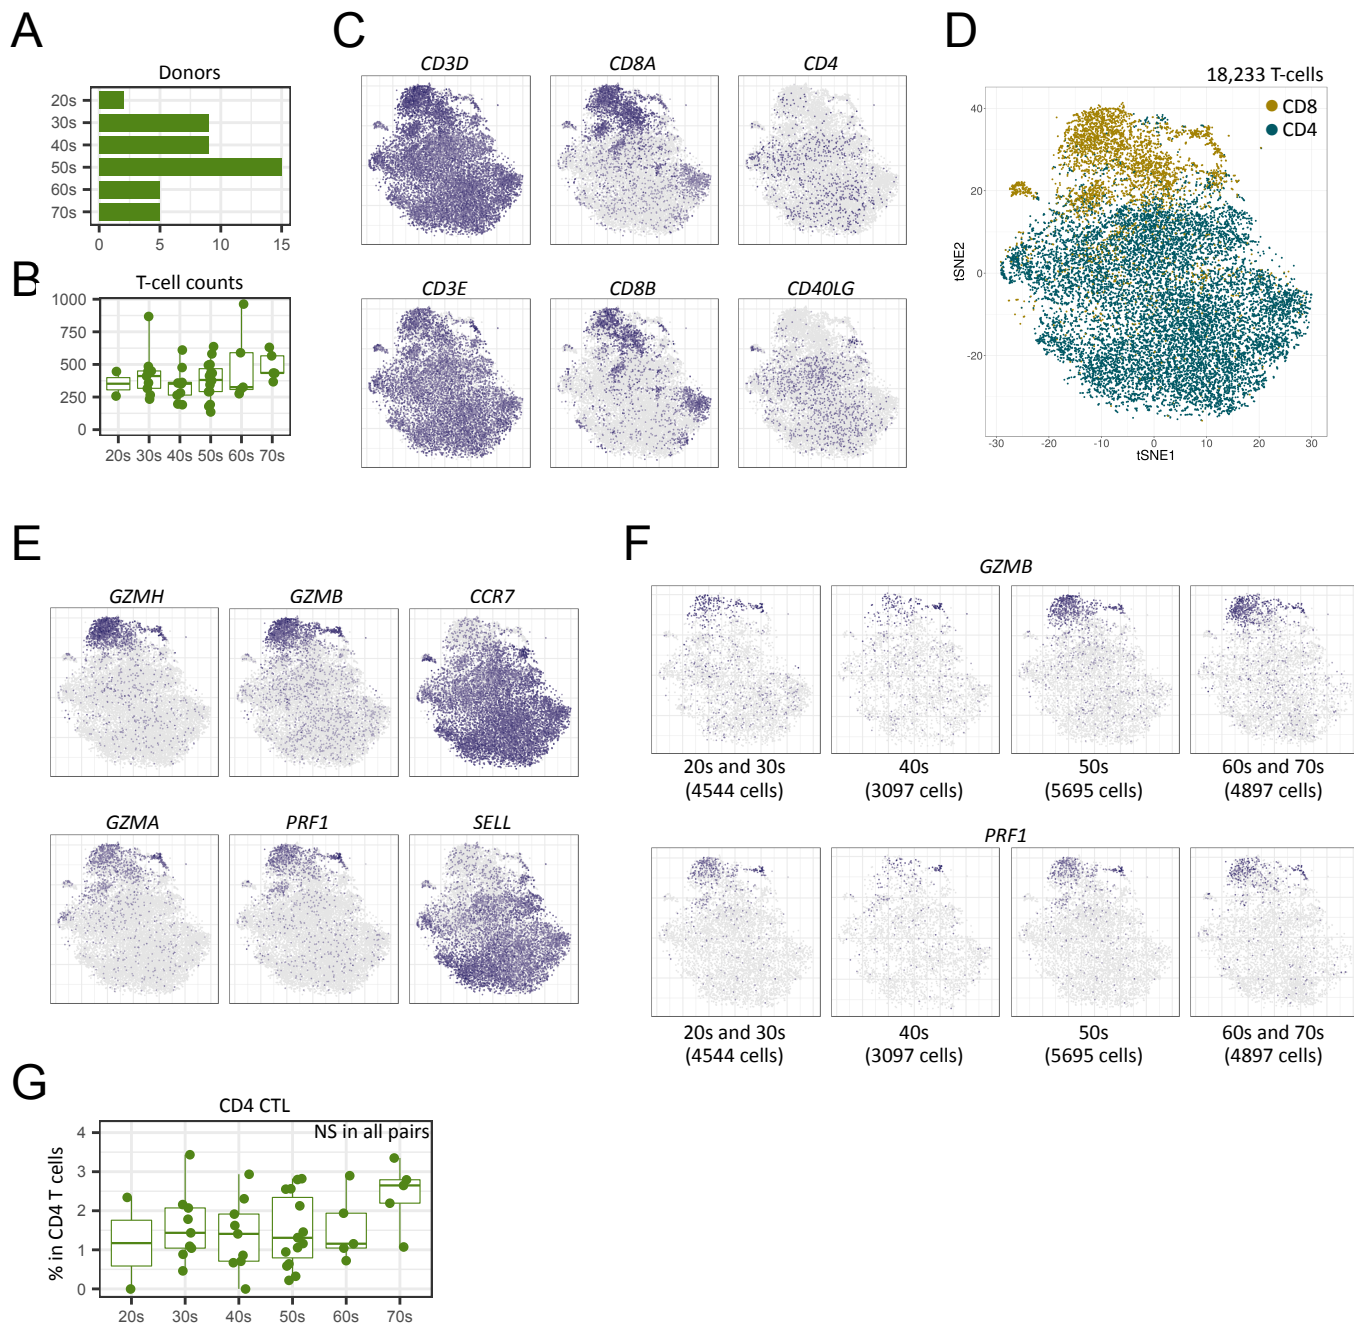

Figure S6

A

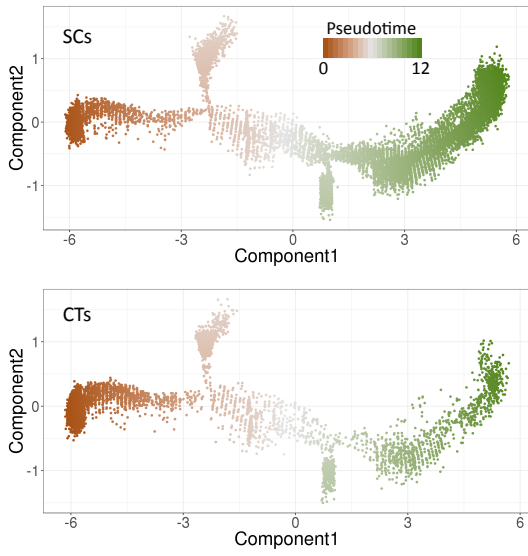

B

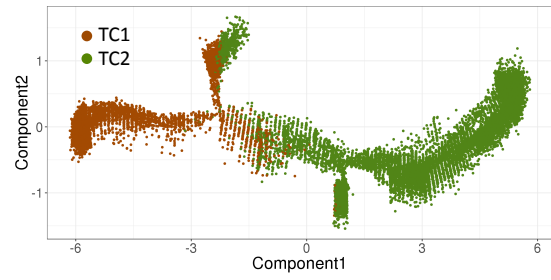

C

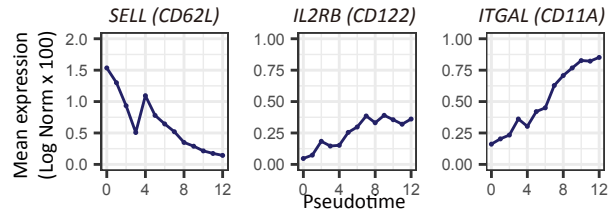

D

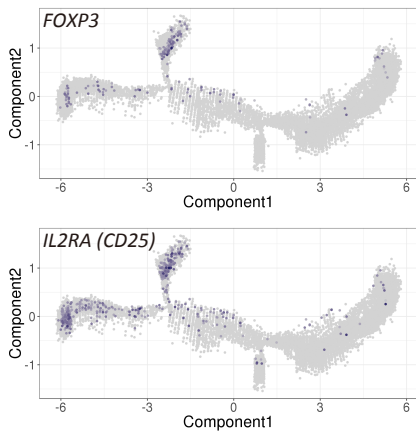

E

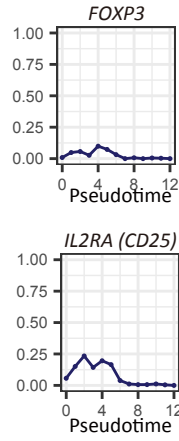

F

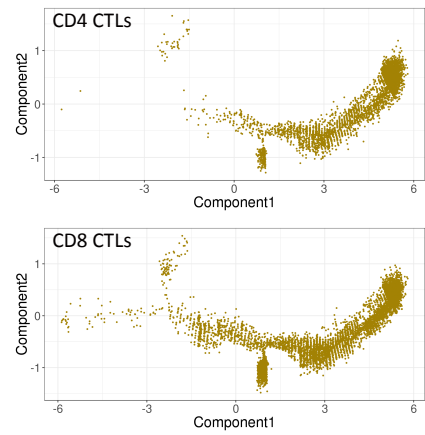

G

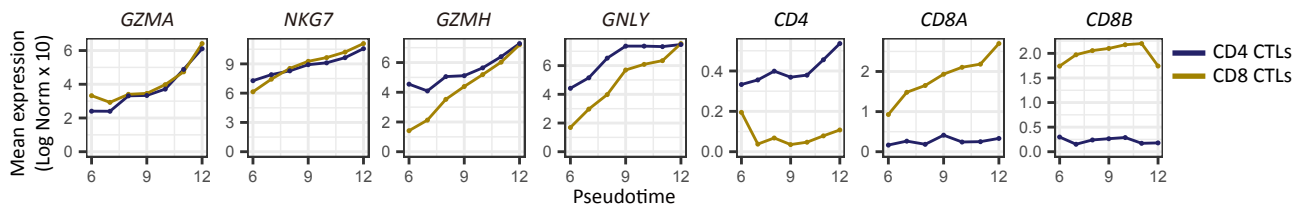



Figure S7

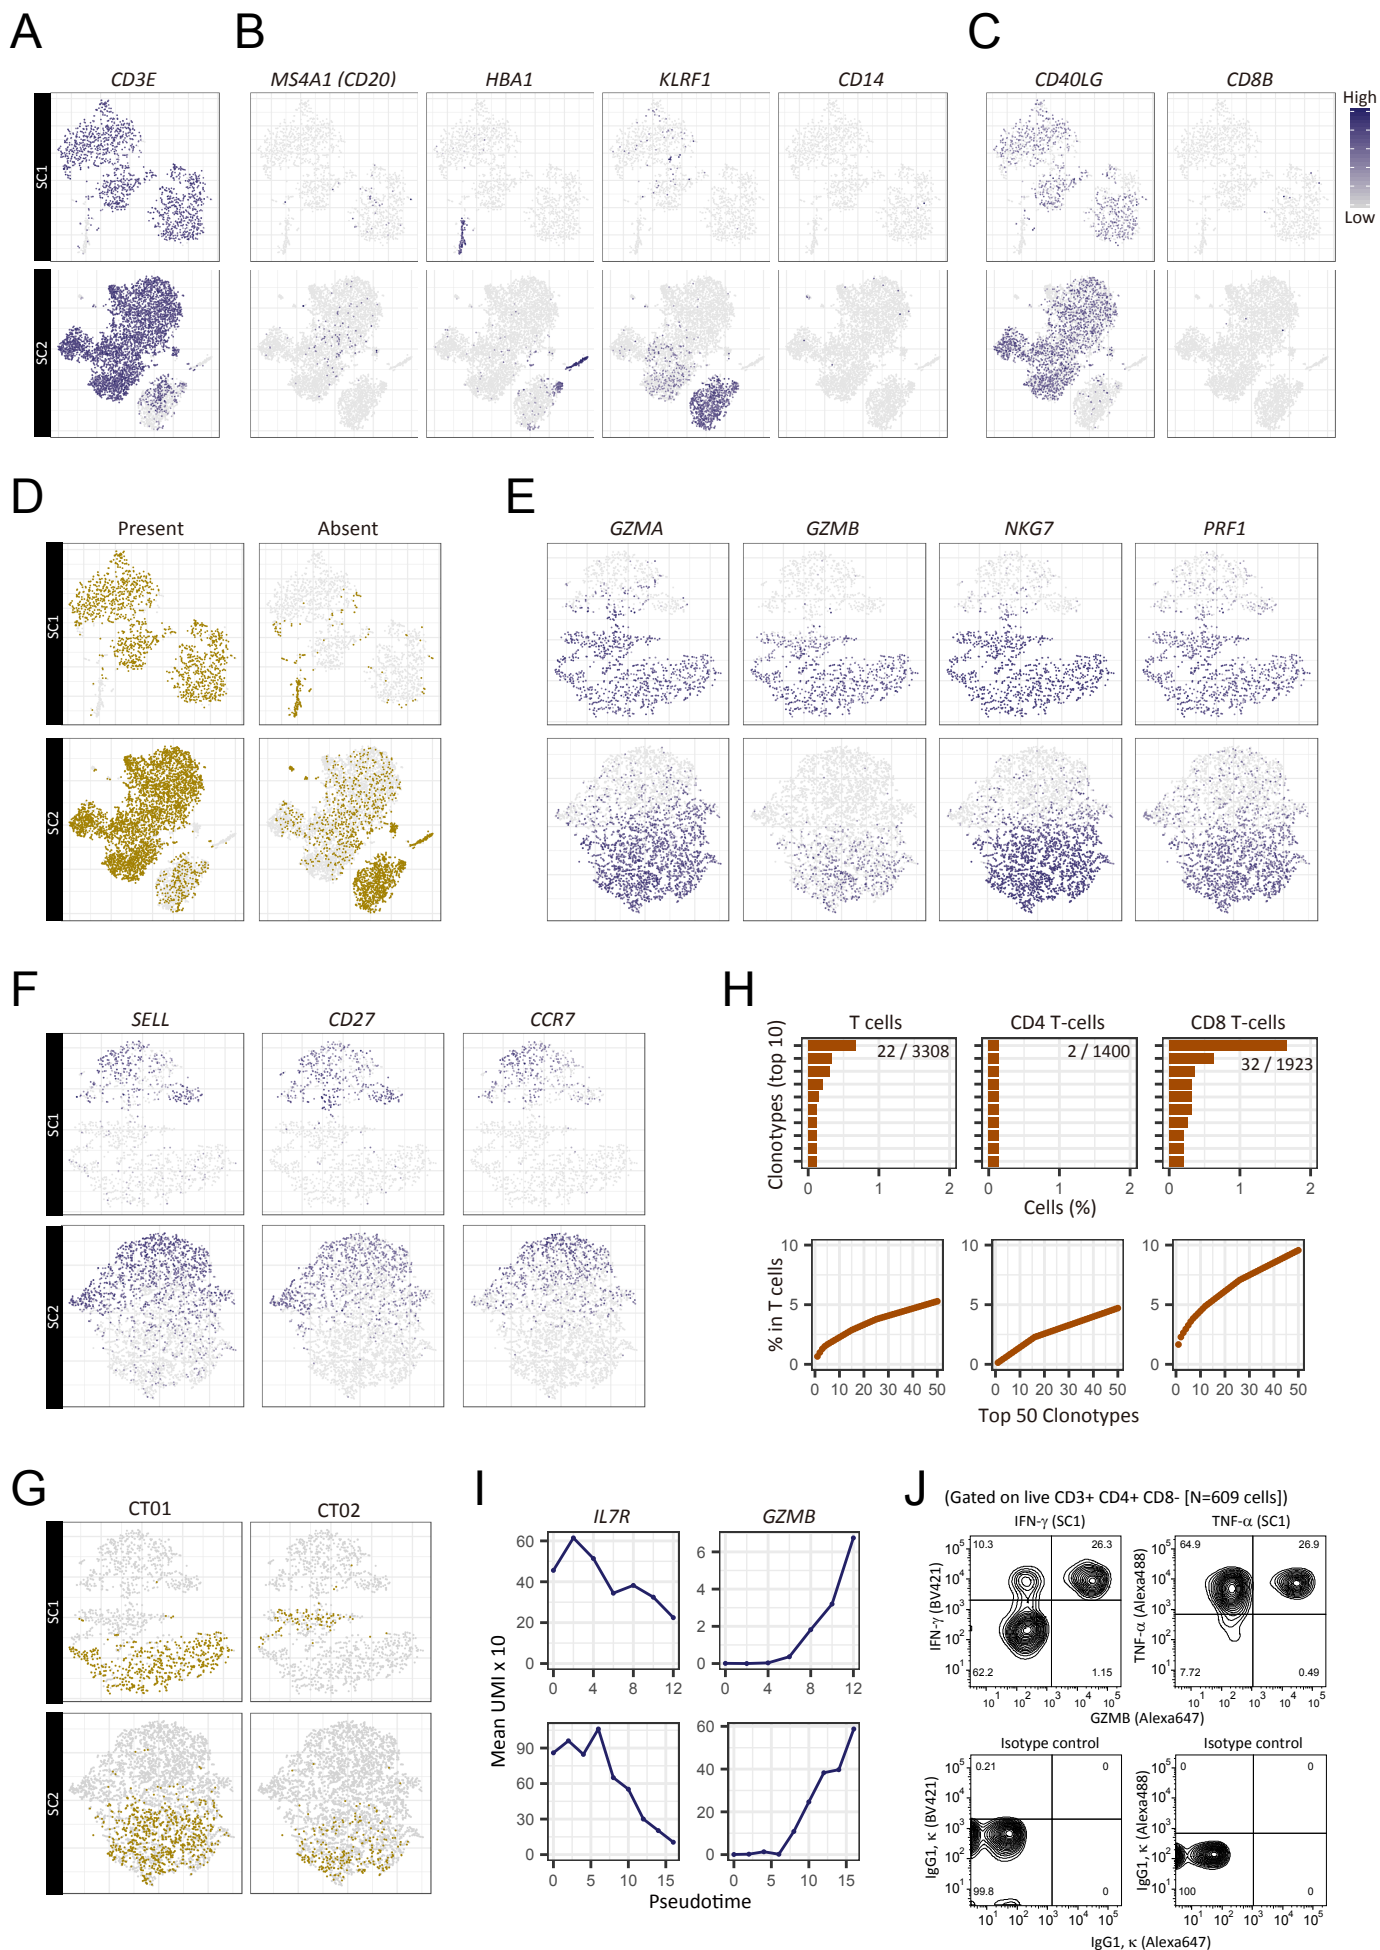

**Figure S1.** Single-cell transcriptome profile of PBMCs. **a.** Samples used for single-cell RNA-Seq and FACS analyses. FACS1 used antibodies against major cell-type markers: CD3, CD19, CD14, CD16, and NCAM1 (CD56), whereas FACS2 used antibodies against T-cell subtype markers: CD3, CD4, CD8, and GZMB. **b.** Median numbers of UMI counts per cell for each donor **c.** Two-dimensional tSNE visualization, separated into supercentenarians and controls. Different colors in the right panel represent 4 age groups. **d.** Two-dimensional tSNE visualization, separated into two or three donor groups. **e.** Expression of marker genes for cell-type markers and *MALAT1* as the highest expressed gene; cell positions are from the t-SNE plots in Fig. 1c. **f.** Expression of marker genes used to define three small clusters by k-means clustering (i.e., MKI67+ proliferating cells [MKI], dendritic cells [DC], and megakaryocytes [MGK]).

**Figure S2.** Reduction in the number of B cells in supercentenarians. **a.** Boxplots of the percentage of each indicated cell type in PBMCs. **b.** FACS plots for four supercentenarians (SC1–SC4) and three controls (CT1–CT3) profiled using CD3, CD19, NCAM1 (CD56), CD14, and FCGR3A (CD16). **c.** Two-dimensional tSNE visualization of B cells for all 12 donors or separately for two or three donor groups. **d.** Expression of markers for B-cell subtypes. **e.** Expression of immunoglobulin heavy chains in each B-cell subtype. Upper panel shows total expression of *IGHM* and *IGHD*, which are used before the class switch. Lower panel shows total expression of *IGHA1*, *IGHA2*, *IGHG1*, *IGHG2*, *IGHG3*, and *IGHG4*, which are used after the class switch. **f.** Boxplots of the percentage of each B-cell subtype (defined by k-means clustering) in PBMCs of seven supercentenarians (SC1–SC7) and five controls (CT1–CT5). \*,  $P < 0.05$  (Wilcoxon rank sum test); no asterisk means not significant.

**Figure S3.** Expansion of cytotoxic T-cell populations in supercentenarians. **a.** Two-dimensional tSNE visualization of T cells using the Seurat R package. Different colors represent the original TC1 and TC2 clusters; 86.3% of the original TC1 is clustered into Seurat\_TC1; 97.6% of the original TC2 is clustered into Seurat\_TC2. **b–d.** Expression of cytotoxic genes and lymph node homing markers; cell positions are from the t-SNE plot in **a.**

**Figure S4.** Expansion of cytotoxic CD4 T-cell populations in supercentenarians. **a.** CD8 CTLs defined based on the expression of *CD8A* and *CD8B*; cell positions are from the t-SNE plot in Fig. 4a. **b.** Percentages of CD8 T-cells among the total T-cells. \*,  $P < 0.05$  (Wilcoxon rank sum test). **c.** FACS profiles of supercentenarians (SC1, SC5–SC7, SC9, and SC10) and one semi-supercentenarian (SC8), and controls (CT4–CT8). Cells gated on CD3+ were profiled using CD4 (x-axis) and CD8 (y-axis). Cells in lower right and upper left corners are classified as CD4 and CD8 T-cells, respectively. **d.** FACS profiles of five controls (CT4–CT8). Cells gated on CD3+



were profiled using CD4 (x-axis) and GZMB (y-axis). **e.** Ratio between the percentage of GZMB+ and GZMB- cells in CD4 (x-axis) and CD8 (y-axis) T-cells. Ratio “1:1” indicates that the percentage of GZMB+ cells equals that of GZMB- cells. **f.** FACS profiles of one supercentenarian (SC2). Cells gated on live CD3+ CD4+ CD8- were profiled using GZMB or IgG1  $\kappa$  (x-axis) and PRF1, GNLY, or IgG2b  $\kappa$  (y-axis).

**Figure S5.** Expressions of cytotoxic genes in T-cells from young donors. **a.** The numbers of donors used in the analysis for each decade of age. **b.** The numbers of T-cells per donor in each decade of age. **c.** Expression of the indicated marker genes. **d.** Two-dimensional tSNE visualization of 18,233 T cells using the Seurat R package. Different colors represent two subtypes defined by the original paper. **e.** Expression of the indicated marker genes. **f.** Expression of *GZMB* and *PRF1* in each age group. **g.** Percentages of estimated CD4 CTLs in CD4 T-cells. NS means not significant (Wilcoxon rank sum test).

**Figure S6.** The differentiation state of T cells in supercentenarians. **a.** Pseudotime trajectory of T cells, shown separately for supercentenarians (SC) and controls (CT). **b.** Pseudotime trajectory of T cells colored by TC1 and TC2. **c.** Expression transition of differentiation-associated genes. **d.** Expression of *FOXP3* and *IL2RA* (*CD25*) mapped in pseudotime. **e.** Expression transition of *FOXP3* and *IL2RA* (*CD25*) along the pseudotime. **f.** Distribution of CD4 and CD8 CTLs mapped in pseudotime. **g.** Expression transition of selected genes shown separately for CD4 and CD8 CTLs.

**Figure S7.** Single-cell 5' transcriptome and TCR profiles for two supercentenarians (SC1, upper panels and SC2, lower panels). **a.** Expression of a marker gene for T-cells. **b.** Expression of marker genes for B-cells (*MS4A1*), erythrocytes (*HBA1*), NK cells (*KLRF1*), and monocytes (*CD14*). **c.** Expression of marker genes for CD4 T-cells (*CD40LG*) and CD8 T-cells (*CD8B*). **d.** Presence or absence of cells in TCR libraries. **e.** Expression of marker genes for cytotoxic T-cells. **f.** Expression of marker genes for T-cell differentiation. **g.** Distribution of the top 2 most abundant clonotypes, CD01 and CT02, on the t-SNE map. **h.** Diversity of TCRs in publicly available datasets released by another group. **i.** Transient expression of genes associated with T-cell differentiation. **j.** FACS profiles of one supercentenarian (SC1) upon PMA/ionomycin stimulation. Cells gated on live CD3+ CD4+ CD8- were profiled using GZMB or IgG1  $\kappa$  (x-axis) and IFN- $\gamma$ , TNF- $\alpha$ , or IgG1  $\kappa$  (y-axis). The graph is shown in contour plot due to the small number of cells (609 cells) available.
